# Supplementary material
Source: PubMed Central journal article supplement (PMC5373097)
Supplement: NIHMS816960-supplement.pdf [file NIHMS816960-supplement.pdf]

# Impulsive-Antisocial Dimension of Psychopathy Linked to Enlargement and Abnormal Functional Connectivity of the Striatum

## *Supplemental Information*

### **Supplemental Results**

#### **Regional Volume Regressions in FreeSurfer and SPM**

Note: All relationships reported as significant in the full model are also significant in a zero-order correlation unless otherwise specified.

*Total PCL-R (covarying for substance abuse severity, intracranial volume, age, race)*

Right nucleus accumbens volume had a significant positive association with total PCL-R score in SPM ( $p=0.027$ ,  $B=0.205$ ) and a trending association in the same direction in FreeSurfer ( $p=0.057$ ,  $B=0.176$ ). Left nucleus accumbens volume had a significant positive association with total PCL-R score in both FreeSurfer ( $p=0.012$ ,  $B=0.231$ ) and SPM ( $p=0.047$ ,  $B=0.180$ ).

*Factor 1 (covarying for Factor 2, substance abuse severity, intracranial volume, age, race)*

Right putamen volume had a significant negative association with Factor 1 score in SPM ( $p=0.042$ ,  $B=-0.207$ ); however, the association was not significant in FreeSurfer ( $p=0.385$ ,  $B=-0.091$ ), and the zero-order correlation between the volume of this region and Factor 1 score was not significant. This association was also not significant when Factor 2 score was removed as a covariate from the model.

*Factor 2 (covarying for Factor 1, substance use severity, intracranial volume, age, race)*

Right nucleus accumbens volume had a significant positive association with Factor 2 score in SPM ( $p=0.001$ ,  $B=0.380$ ) and a non-significant association in the same direction in FreeSurfer ( $p=0.119$ ,  $B=0.184$ ). Likewise, left nucleus accumbens volume had a significant positive association with Factor 2 score in SPM ( $p=0.038$ ,  $B=0.239$ ) and a non-significant association in

the same direction in FreeSurfer ( $p=0.189$ ,  $B=0.153$ ). Right putamen volume had a significant positive association with Factor 2 score in SPM ( $p=0.001$ ,  $B=0.368$ ) and in FreeSurfer ( $p=0.038$ ,  $B=0.234$ ). Left putamen volume had a significant positive association with Factor 2 score in FreeSurfer ( $p=0.036$ ,  $B=0.234$ ); however, this association was not significant in SPM ( $p=0.243$ ,  $B=0.131$ ), and the zero-order correlation between the volume of this region and Factor 2 score was not significant. Right globus pallidus volume had a significant positive relationship with Factor 2 score in SPM ( $p=0.003$ ,  $B=0.336$ ) but no relationship in FreeSurfer ( $p=0.989$ ,  $B=0.002$ ). Right caudate volume had a significant positive relationship with Factor 2 scores in SPM ( $p=0.010$ ,  $B=0.303$ ); the association was not significant in FreeSurfer ( $p=0.299$ ,  $B=-0.104$ ). All of the significant associations, with the exception of the right caudate association, remained significant when Factor 1 score was removed as a covariate from the model.

**Table S1.** Correlation of regional volumes between FreeSurfer and SPM

| Region                    | Correlation Coefficient (p-value) |
|---------------------------|-----------------------------------|
| Putamen (L)               | .271 ( $p=0.002$ )                |
| Putamen (R)               | .366 ( $p<0.001$ )                |
| Caudate (L)               | .262 ( $p=0.003$ )                |
| Caudate (R)               | .219 ( $p=0.014$ )                |
| Accumbens (L)             | .271 ( $p=0.002$ )                |
| Accumbens (R)             | .302 ( $p=0.001$ )                |
| Globus Pallidus (L)       | .171 ( $p=0.058$ )                |
| Globus Pallidus (R)       | .028 ( $p=0.761$ )                |
| Intracranial Volume (ICV) | .523 ( $p<0.001$ )                |

**Table S2.** Total PCL-R regional volume regressions in FreeSurfer and SPM

| Region            | Standardized Beta | t-value | p-value      | Relationship | Zero-Order Correlation (p-value) |
|-------------------|-------------------|---------|--------------|--------------|----------------------------------|
| <b>FreeSurfer</b> |                   |         |              |              |                                  |
| Accumbens (L)     | 0.231             | 2.558   | <b>0.012</b> | Positive     | 0.076                            |
| Accumbens (R)     | 0.176             | 1.919   | 0.057        | Positive     | <b>0.032</b>                     |
| <b>SPM</b>        |                   |         |              |              |                                  |
| Accumbens (L)     | 0.180             | 2.007   | <b>0.047</b> | Positive     | 0.077                            |
| Accumbens (R)     | 0.205             | 2.243   | <b>0.027</b> | Positive     | <b>0.022</b>                     |

**Table S3.** Factor 1 (covarying for Factor 2) regional volume regressions in SPM

| Region      | Standardized Beta | t-value | p-value      | Relationship | Zero-Order Correlation (p-value) |
|-------------|-------------------|---------|--------------|--------------|----------------------------------|
| Putamen (R) | -0.207            | -2.061  | <b>0.042</b> | Negative     | 0.658                            |

**Table S4.** Factor 2 (covarying for Factor 1) regional volume regressions in FreeSurfer and SPM

| Region              | Standardized Beta | t-value | p-value      | Relationship | Zero-Order Correlation (p-value) |
|---------------------|-------------------|---------|--------------|--------------|----------------------------------|
| <b>FreeSurfer</b>   |                   |         |              |              |                                  |
| Putamen (L)         | 0.234             | 2.116   | <b>0.036</b> | Positive     | 0.176                            |
| Putamen (R)         | 0.234             | 2.098   | <b>0.038</b> | Positive     | 0.192                            |
| <b>SPM</b>          |                   |         |              |              |                                  |
| Putamen (R)         | 0.368             | 3.422   | <b>0.001</b> | Positive     | <b>0.015</b>                     |
| Caudate (R)         | 0.303             | 2.617   | <b>0.010</b> | Positive     | <b>0.035</b>                     |
| Accumbens (L)       | 0.239             | 2.095   | <b>0.038</b> | Positive     | <b>0.044</b>                     |
| Accumbens (R)       | 0.380             | 3.351   | <b>0.001</b> | Positive     | <b>0.002</b>                     |
| Globus Pallidus (R) | 0.336             | 3.090   | <b>0.003</b> | Positive     | <b>0.049</b>                     |

**Table S5.** Total PCL-R focal volume voxel-wise regressions in SPM

| <b>Region</b>       | <b>pFWE</b>  | <b>MNI Peak Coordinates</b> | <b>Relationship</b> | <b>Cluster Size</b> |
|---------------------|--------------|-----------------------------|---------------------|---------------------|
| Putamen (L)         | <b>0.022</b> | (-20, 15, 3)                | Positive            | 27                  |
|                     | <b>0.035</b> | (-14, 12, -6)               | Positive            | 7                   |
|                     | <b>0.042</b> | (-16, 15, -4)               | Positive            | 2                   |
| Globus Pallidus (R) | <b>0.017</b> | (20, -4, 6)                 | Positive            | 3                   |
|                     | <b>0.035</b> | (16, -2, 2)                 | Positive            | 2                   |
| Globus Pallidus (L) | <b>0.021</b> | (-12, 8, -6)                | Positive            | 17                  |
| Accumbens (R)       | <b>0.021</b> | (14, 12, -8)                | Positive            | 21                  |
| Accumbens (L)       | <b>0.011</b> | (-12, 8, -8)                | Positive            | 26                  |

**Table S6.** Factor 1 (covarying for Factor 2) focal volume voxel-wise regressions in SPM

| <b>Region</b> | <b>pFWE</b>  | <b>MNI Peak Coordinates</b> | <b>Relationship</b> | <b>Cluster Size</b> |
|---------------|--------------|-----------------------------|---------------------|---------------------|
| Putamen (R)   | <b>0.028</b> | (24, -10, 14)               | Positive            | 3                   |

**Table S7.** Factor 2 (covarying for Factor 1) focal volume voxel-wise regressions in SPM

| Region              | pFWE             | MNI Peak Coordinates | Relationship | Cluster Size |
|---------------------|------------------|----------------------|--------------|--------------|
| Caudate (L)         | <b>0.006</b>     | (-2, 8, -9)          | Positive     | 20           |
|                     | <b>0.006</b>     | (-18, 18, 3)         | Positive     | 32           |
|                     | <b>0.030</b>     | (-21, 15, 14)        | Positive     |              |
| Accumbens (L)       | <b>0.018</b>     | (-8, 8, -12)         | Positive     | 44           |
| Accumbens (R)       | <b>0.001</b>     | (6, 10, -10)         | Positive     | 145          |
|                     | <b>0.001</b>     | (16, 14, -12)        | Positive     |              |
| Globus Pallidus (R) | <b>0.016</b>     | (16, 10, -4)         | Positive     | 260          |
|                     | <b>0.016</b>     | (26, -10, 2)         | Positive     |              |
|                     | <b>0.020</b>     | (20, -3, 4)          | Positive     |              |
| Putamen (L)         | <b>&lt;0.001</b> | (-20, 18, -2)        | Positive     | 135          |
|                     | <b>0.001</b>     | (-21, 14, 8)         | Positive     |              |
| Putamen (R)         | <b>0.004</b>     | (18, 14, -10)        | Positive     | 172          |
|                     | <b>0.028</b>     | (21, 10, 3)          | Positive     |              |
|                     | <b>0.036</b>     | (27, -10, 0)         | Positive     | 34           |

**Table S8.** Total PCL-R RSFC regressions

| Focal Seed          | Seed Origin Coordinates | RSFC Relationship with:               | MNI Peak Coordinates | Cluster Size | t-value |
|---------------------|-------------------------|---------------------------------------|----------------------|--------------|---------|
| Putamen (L)         | (-20, 15, 3)            | Superior Lateral Occipital Cortex (R) | (-32.5, 59.5, 33.5)  | 146          | -5.18   |
| Globus Pallidus (R) | (16, -2, 2)             | Cuneal Cortex (R)                     | (-5.5, 86.5, 39.5)   | 366          | -5.13   |

Negative t-value indicates negative relationship.

**Table S9.** Factor 2 (covarying for Factor 1) RSFC regressions

| <b>Focal Seed</b>   | <b>Seed Origin Coordinates</b> | <b>RSFC Relationship with:</b>        | <b>MNI Peak Coordinates</b> | <b>Cluster Size</b> | <b>t-value</b> |
|---------------------|--------------------------------|---------------------------------------|-----------------------------|---------------------|----------------|
| Caudate (L)         | (-18, 18, 3)                   | Putamen (L)                           | (18.5, -6.5, 3.5)           | 124                 | 4.00           |
| Accumbens (R)       | (6, 10, -10)                   | Dorsolateral Prefrontal Cortex (R)    | (-38.5, -30.5, 39.5)        | 188                 | 4.26           |
|                     | (16, 14, -12)                  | Postcentral Gyrus (L)                 | (24.5, 32.5, 54.5)          | 202                 | -5.31          |
| Globus Pallidus (R) | (16, 10, -4)                   | Precentral Gyrus (L)                  | (12.5, 8.5, 63.5)           | 561                 | -4.41          |
|                     |                                | Postcentral Gyrus (L)                 | (24.5, 32.5, 54.5)          | 188                 | -4.77          |
| Putamen (L)         | (-20, 18, -2)                  | Ventral Midbrain                      | (3.5, 17.5, -23.5)          | 149                 | 4.09           |
|                     |                                | Superior Lateral Occipital Cortex (R) | (-38.5, 83.5, 27.5)         | 113                 | -3.79          |
|                     |                                | Globus Pallidus (L)                   | (18.5, 11.5, -5.5)          | 106                 | 3.85           |
| Putamen (R)         | (18, 14, -10)                  | Postcentral Gyrus (L)                 | (24.5, 32.5, 51.5)          | 209                 | -5.67          |
|                     | (21, 10, 3)                    | Putamen (L)                           | (27.5, -6.5, -5.5)          | 123                 | 4.70           |

Negative t-value indicates negative relationship.
